# Supplementary material
Source: bioRxiv or medRxiv preprint supplement (https://www.biorxiv.org/highwire/filestream/53233/field_highwire_adjunct_files/0/150078-1.pdf)
Supplement: Supplementary file [file 150078-1.pdf]

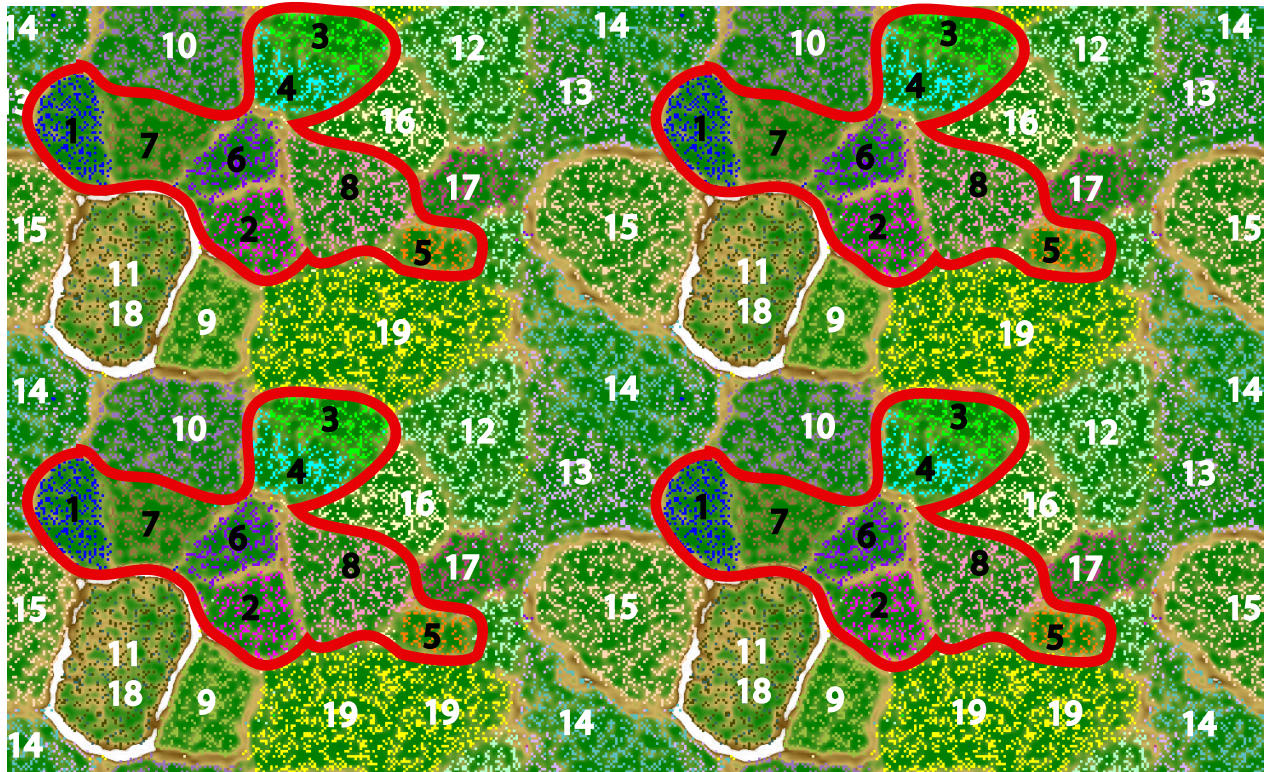

**Fig. S1.** A tiled display of an emergent self-organizing map (ESOM) based on the tetranucleotide frequency (TNF) of the 19 Verrucomicrobia MAGs. TNF was calculated with a window size of 5 kbp, with each dot on the ESOM representing a 5-kbp fragment (or a contig if its length is shorter than 5 kbp). Dots (i.e. fragments) are colored according to MAGs. A numeric ID is assigned to each MAG, and IDs from Mendota are labeled in black and IDs from Trout Bog labeled in white. A red outline was drawn to indicate the clustering of MAGs from Mendota on the ESOM.



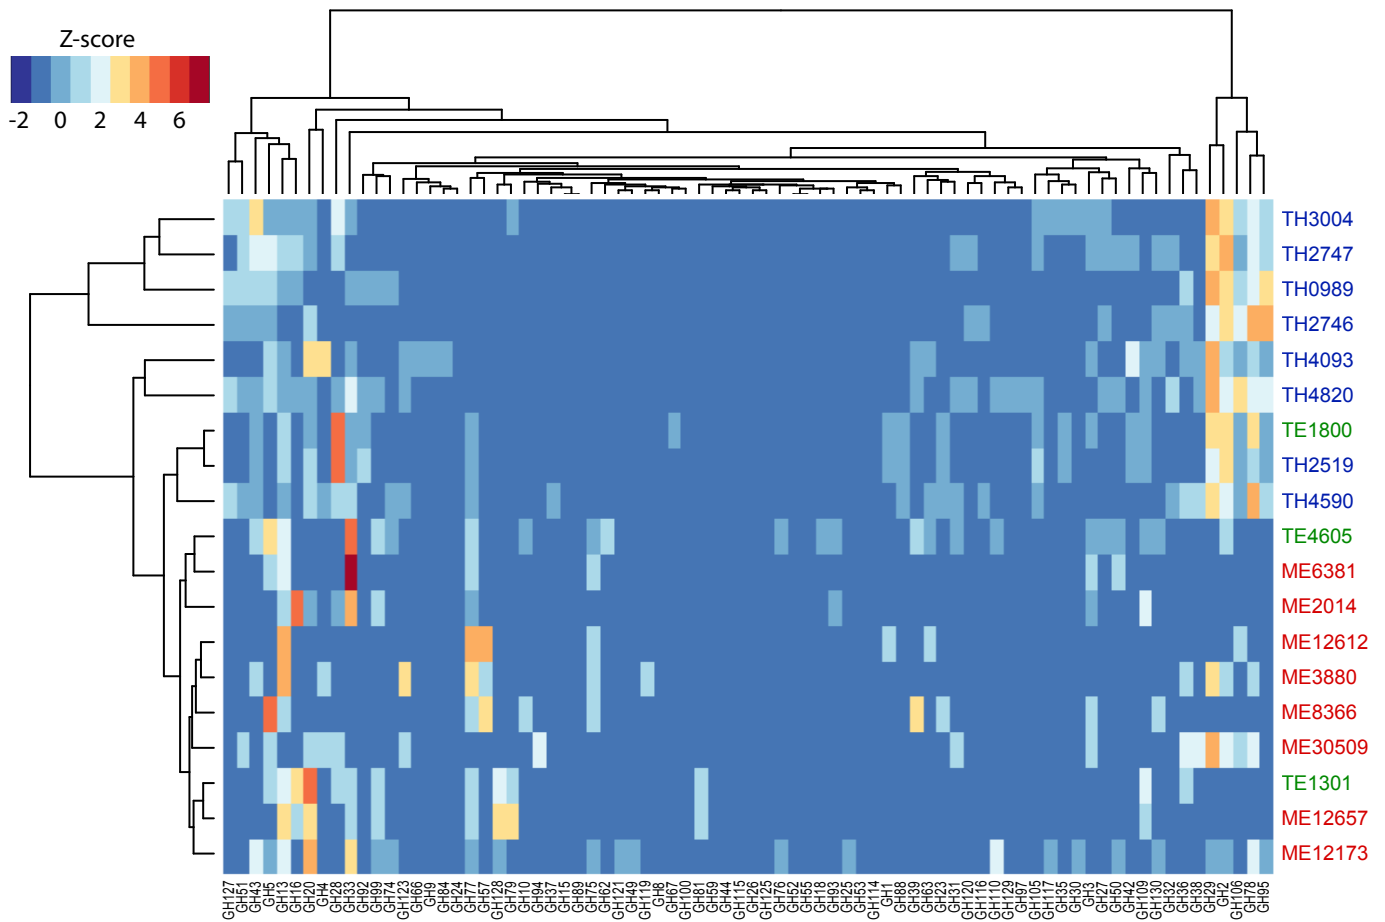

**Fig. S3.** Heat map based on GH abundance profile patterns showing the clustering of MAGs by different lakes.



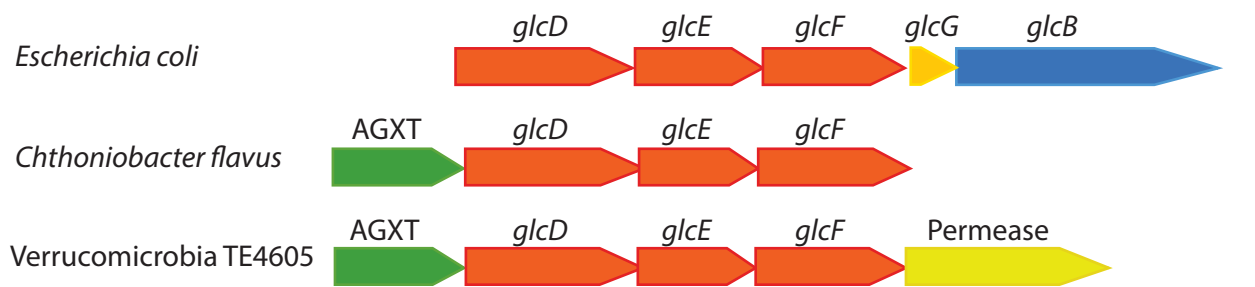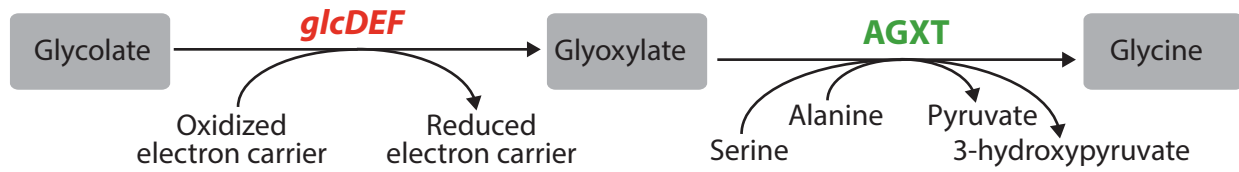

*glcDEF*: subunits of glycolate oxidase

*glcG*: Uncharacterized *glc* operon protein GlcG

*glcB*: Malate synthase G

AGXT: Alanine-glyoxylate transaminase / serine-glyoxylate transaminase / serine-pyruvate transaminase

Permease: L-lactate permease family to which GlcA (glycolate permease) belongs to.

**Fig. S5.** Comparison of glycolate oxidase gene operons in *E. coli*, *C. flavus* and TE4605.
